# Supplementary material for: The power of pathway-based polygenic risk scores
Source: Research Square preprint supplement (doi:10.21203/rs.3.rs-643696/v1), 2021-06-28
Supplement: Supplementary file 1 [file 5544244458809a00cc63b7a6.xlsx]

## Sheet: Extended_Data_Table1
Extended Data Table 1. Cohorts used as base and target samples in analyses evaluating pathway enrichment (Post genetic QC)
	Base sample		Target sample
Disease / Trait	GWAS reference	N (case/control)	Cohort	N (case / control)
Alzheimer’s Disease	Kunkle et al (2019)	94,437 (35,274 / 59,163)	UK Biobank	264210
Alcohol Consumption	Kranzler et al (2019)	274424	UK Biobank	126956
Body Mass Index (obesity)	Locke et al (2015)	339224	UK Biobank	386280
Coronary Artery Disease	Nikpay et al (2015)	184,305 (60,801 / 123,504)	UK Biobank	274,377 (19,348 / 255,029)
Low-Density Lipoprotein	Willer et al (2013)	188577	UK Biobank	274367
Schizophrenia	Ripke et al (2018) (Repeated meta-analysis removing Swedish cohort)	70,628 (26,752 / 35,314)	Sweden-Schizophrenia Population-Based cohort	10,962 (4,834 / 6,128)

## Sheet: Extended_Data_Table2
Extended Data Table 2. Coding correspond to statin in UK Biobank medication records (Field ID 20003)
Medication Code	Name
1141146234	atorvastatin
1141192414	crestor 10mg tablet
1140910632	eptastatin
1140888594	fluvastatin
1140864592	lescol 20mg capsule
1141146138	lipitor 10mg tablet
1140861970	lipostat 10mg tablet
1140888648	pravastatin
1141192410	rosuvastatin
1141188146	simvador 10mg tablet
1140861958	simvastatin
1140881748	zocor 10mg tablet
1141200040	zocor heartpro 10mg tablet
1140861922	lipid lowering Drug

## Sheet: Extended_Data_Table3
Extended Data Table 3. Phenotypes used in pathway enrichment analyses and correlation with Malacards relevance scores
Phenotype	N genes in Malacards	Search term in Malacards database
Body Mass Index	474	body_mass_index_quantitative_trait_locus_11
Alzheimer's Disease	499	alzheimer_disease
Schizophrenia	488	schizophrenia
Alcohol Use Disorder	352
	56	Alcohol Use Disorder
	116	Alcohol Dependence
	108	Cirrhosis
	72	Liver Disease
Coronary Artery Disease	503
	103	Anomalies of Arteries
	326	Myocardial Infarction
	74	Acute Myocardial Infarction
Low-Density Lipoprotein	205
	71	Lipid Metabolism Disorder
	75	Lipid Storage Disease
	59	Familial hypercholesterolemia

## Sheet: Extended_Data_Table4
Extended Data Table 4. Expert opinon on tissue and cell type relevance for each disease
Tissue	Detail	Type	Schizophrenia.Expert1	Schizophrenia.Expert2	Alcohol.Expert1	AD.Expert1	AD.Expert2	BMI.Expert1	CAD.Expert1	CAD.Expert2	LDL.Expert1
Astrocytes	astrocytes_ependymal	Cell	0	0	1	1	1
Neuron	Dopaminergic Adult	Cell	1	0	1	0	0
Neuron	Dopaminergic Neuroblast	Cell	1	0	1	0	0
Neuron	Embryonic Dopaminergic Neuron	Cell	1	0	1	0	0
Neuron	Embryonic GABAergic Neuron	Cell	1	1	1	0	0
Neuron	Embryonic midbrain nucleus neurons	Cell	1	0	1	0	0
endothelial-mural	endothelial-mural	Cell	0	0	1	0	0
Neuron	Hypothalamic Dopaminergic Neurons	Cell	1	0	0	0	0
Neuron	Hypothalamic GABAergic Neurons	Cell	1	1	0	0	0
Neuron	Hypothalamic Glutamatergic Neurons	Cell	1	1	0	0	0
Neuron	interneurons	Cell	1	1	0	0	0
Neuron	Medium Spiny Neuron	Cell	1	1	0	0	0
microglia	microglia	Cell	0	0	1	1	1
Neuron	Neural Progenitors	Cell	1	1	0	0	0
Neuron	Neuroblasts	Cell	1	1	0	0	0
Oligodendrocyte Precursor	Oligodendrocyte Precursor	Cell	0	0	0	1	0
Oligodendrocytes	Oligodendrocytes	Cell	0	0	0	1	1
Neuron	Oxytocin and Vasopressin Expressing Neurons	Cell	1	0	0	0	0
Neuron	pyramidal CA1	Cell	1	1	0	0	1
Neuron	pyramidal SS	Cell	1	1	0	0	1
Radial glia like cells	Radial glia like cells	Cell	0	1	0	0	1
Neuron	Serotonergic Neuron	Cell	1	0	1	0	0
Neuron	Striatal Interneuron	Cell	1	1	0	0	0
Vascular Leptomeningeal Cells	Vascular Leptomeningeal Cells	Cell	0	0	0	0	1
Adipose Tissue	Adipose - Subcutaneous	Tissue	0	0	0	1	0	1	7	1	3
Adipose Tissue	Adipose - Visceral (Omentum)	Tissue	0	0	0	1	0	1	5	1	2
Adrenal Gland	Adrenal Gland	Tissue	0	0	0	0	0		10		7
Bladder	Bladder	Tissue	0	0	1	0	0		27		27
Blood	Whole Blood	Tissue	0	0	1	1	1	1	4	1	5
Blood	Cells - EBV-transformed lymphocytes	Tissue	0	0	0	1	1		27		27
Blood Vessel	Artery - Tibial	Tissue	0	0	0	0	0		2		24
Blood Vessel	Artery - Coronary	Tissue	0	0	0	0	0		1		23
Blood Vessel	Artery - Aorta	Tissue	0	0	0	0	0		3	1	25
Bone Marrow	Cells - Leukemia cell line (CML)	Tissue	0	0	0	0	0		27		27
Brain	Brain - Frontal Cortex (BA9)	Tissue	1	1	1	1	1	1	26		18
Brain	Brain - Cortex	Tissue	1	1	1	1	1	1	26		18
Brain	Brain - Cerebellum	Tissue	1	1	0	1	1	1	26		18
Brain	Brain - Cerebellar Hemisphere	Tissue	1	1	0	1	1	1	26		18
Brain	Brain - Caudate (basal ganglia)	Tissue	1	1	1	1	1	1	26		18
Brain	Brain - Nucleus accumbens (basal ganglia)	Tissue	1	1	1	1	1	1	26		18
Brain	Brain - Putamen (basal ganglia)	Tissue	1	1	0	1	1	1	26		18
Brain	Brain - Hypothalamus	Tissue	1	1	0	1	1	1	9	1	4
Brain	Brain - Spinal cord (cervical c-1)	Tissue	1	1	0	1	1	1	26		18
Brain	Brain - Hippocampus	Tissue	1	1	0	1	1	1	26		18
Brain	Brain - Anterior cingulate cortex (BA24)	Tissue	1	1	0	1	1	1	26		18
Brain	Brain - Substantia nigra	Tissue	1	1	1	1	1	1	26		18
Brain	Brain - Amygdala	Tissue	1	1	0	1	1		26		18
Breast	Breast - Mammary Tissue	Tissue	0	0	0	0	0		27		27
Cervix Uteri	Cervix - Ectocervix	Tissue	0	0	0	0	0		27		27
Cervix Uteri	Cervix - Endocervix	Tissue	0	0	0	0	0		27		27
Colon	Colon - Sigmoid	Tissue	0	0	1	0	0		23		15
Colon	Colon - Transverse	Tissue	0	0	0	0	0		23		15
Esophagus	Esophagus - Muscularis	Tissue	0	0	1	0	0		27		27
Esophagus	Esophagus - Mucosa	Tissue	0	0	1	0	0		27		27
Esophagus	Esophagus - Gastroesophageal Junction	Tissue	0	0	1	0	0		27		27
Fallopian Tube	Fallopian Tube	Tissue	0	0	0	0	0		27		27
Heart	Heart - Atrial Appendage	Tissue	0	0	1	0	0		27		27
Heart	Heart - Left Ventricle	Tissue	0	0	1	0	0		11		26
Kidney	Kidney - Cortex	Tissue	0	0	1	0	0		14		10
Kidney	Kidney - Medulla	Tissue	0	0	1	0	0		15		11
Liver	Liver	Tissue	0	0	1	1	1		6		1
Lung	Lung	Tissue	0	0	1	1	0		21		13
Muscle	Muscle - Skeletal	Tissue	0	0	0	0	0		8	1	6
Nerve	Nerve - Tibial	Tissue	0	1	0	0	0		27		27
Ovary	Ovary	Tissue	0	0	0	0	0		19		22
Pancreas	Pancreas	Tissue	0	0	1	0	0		20		12
Pituitary	Pituitary	Tissue	0	0	0	0	0		16		19
Prostate	Prostate	Tissue	0	0	0	0	0		27		27
Salivary Gland	Minor Salivary Gland	Tissue	0	0	0	0	0		27		27
Skin	Skin - Not Sun Exposed (Suprapubic)	Tissue	0	1	0	0	0		13		9
Skin	Skin - Sun Exposed (Lower leg)	Tissue	0	1	0	0	0		12		8
Skin	Cells - Cultured fibroblasts	Tissue	0	1	0	0	0		27		27
Small Intestine	Small Intestine - Terminal Ileum	Tissue	0	0	0	0	0		25		17
Spleen	Spleen	Tissue	0	0	0	1	0		18		21
Stomach	Stomach	Tissue	0	0	1	0	0		24		16
Testis	Testis	Tissue	0	0	0	0	0		17		20
Thyroid	Thyroid	Tissue	0	0	0	0	0		22		14
Uterus	Uterus	Tissue	0	0	0	0	0		27		27
Vagina	Vagina	Tissue	0	0	0	0	0		27		27

## Sheet: Extended_Data_Table5
Extended Data Table 5. UK Biobank samples used in composite disease / traits
Pseudo composite subtypes analysis
Trait A	Trait B	N (Trait A)	N (Trait B)
CAD	Obesity	84846	14416
LDL	Obesity	64615	18483
Height	Obesity	89102	16796
Height	LDL	25637	12548
CAD	LDL	24520	17597
CAD	Height	19876	21669
CAD	T2D	15597	17848
LDL	T2D	16184	24805
Obesity	T2D	8089	80663
Height	T2D	18950	19742
Pseudo composite subtypes (single trait analysis - Supplementary Note 3)
Trait		N (cases)	N (controls)
Obesity		92818	294574
CAD		22388	365004
LDL		26561	247968
Height		20512	365999
T2D		19668	365501
Real subtypes analysis
Trait A	Trait B	N (Trait A)	N (Trait B)
CAD	LDL	2041	17597
CAD	Obesity	7972	14416
CAD	T2D	4071	17848
LDL	Obesity	8078	18483
LDL	CAD	2041	24520
LDL	T2D	1574	24805
Obesity	LDL	8078	64615
Obesity	CAD	7972	84846
Obesity	T2D	11579	80663
T2D	Obesity	11579	8089
T2D	CAD	4071	15597
T2D	LDL	1574	16184

## Sheet: Extended_Data_Table6
Extended Data Table 6. GWAS summary statistic used in the meta-analysis for sub-phenotype classification analyses
Disease / Trait	N (case/control)	GWAS reference	DOI
Body Mass Index (obesity)	339224	Locke et al (2015)	https://doi.org/10.1038/nature14177
Coronary Artery Disease	184,305 (60,801 / 123,504)	Nikpay et al (2015)	https://doi.org/10.1038/ng.3396
Height	253288	Wood et al (2014)	https://doi.org/10.1038/ng.3097
Type 2 diabetes	159,208 (26,676 / 132,532)	Scott et al (2017)	https://doi.org/10.2337/db16-1253
LDL	188577	Willer CJ et al (2013)	https://doi.org/10.1038/ng.2797
